# Supplementary material
Source: PubMed Central journal article supplement (PMC5382229)
Supplement: halms1150936-supplement_1.pdf [file halms1150936-supplement_1.pdf]

## SUPPLEMENTARY MATERIAL

### Lipid-lowering Drugs and Slower Motor Decline in Elderly Adults

#### SUPPLEMENTARY METHODS

##### *Covariates*

Education was defined as: less than primary school, primary school, secondary without a baccalaureate degree, baccalaureate or university degree. Household income per month at baseline was defined as : < 5000 FF (French Francs) ; 5000 – 10000 FF ; 10000 – 15000 FF ; > 15000 FF. Self-report of doctor-diagnosed coronary (CAD) or peripheral artery disease (PAD), stroke, treated diabetes mellitus, Parkinson's disease, and hip fracture. Systolic (SBP) and diastolic blood pressure (DBP) were measured, and hypertension defined as SBP(DBP)  $\geq$ 140(90) mmHg or use of antihypertensive medication. Smoking history, pack-years of smoking, and alcohol consumption (grams alcohol/week) were assessed. Low physical activity was defined as walking <1 hour/day and exercising <1 time/week (at baseline and wave 5). Weight and height were measured; body mass index (BMI), was computed as weight (kilos) divided by height (meters) squared. Cognition was evaluated using the mini-mental state examination (MMSE). Participants were screened for dementia using a standardized protocol (1). Depressive symptoms were evaluated with the Center for Epidemiological Studies-Depression scale (CES-D) (2). Self-reported measures of physical functioning included: instrumental activities of daily living (IADLs; French version of the Lawton scale(3)); mobility (Rosow-Breslau scale(4)); Katz activities of daily living (5). A 4-level hierarchical disability index was defined based on these scales. Fasting blood samples were obtained at baseline to measure homocysteine, triglycerides, and total, HDL-, and LDL-cholesterol at a single laboratory.

##### *Statistical Analysis*

##### *Propensity Scores*

In sensitivity analyses, we used propensity scores to adjust for confounders (6). We first computed the probability of using LLDs at baseline with a logistic regression model including the following predictors: age, sex, BMI, height, education, depressive symptoms, MMSE score, physical activity, alcohol consumption, smoking, hypertension, diabetes mellitus, triglycerides, HDL-and LDL-cholesterol. Each participant using LLDs at baseline was matched to one non-treated participant on the propensity score in a range of  $\pm 0.05$  using the SAS %MATCH macro (7). Analyses were then repeated using linear mixed models as described above.

##### *Multiple Imputation*

## SUPPLEMENTARY MATERIAL

Data on walking speed over the follow-up were missing due to death, age >85 y, marked gait impairment, examination at home (where walking speed measures were not undertaken), and non-response. To investigate the influence of missing data, we used multiple imputation using surrogate measures of physical functioning (i.e., falls, disability) and measures associated with walking speed (e.g., MMSE, depressive symptoms) available for participants seen at home.

Missing values of walking speed were imputed based on the following covariates: all available walking speed measures, time, age, sex, education, height, BMI, hierarchical disability index, fall in the preceding year, MMSE score, depressive symptoms, and physical activity. No imputation was undertaken in those >85 years or excluded due to conditions associated with gait impairment, and after death. Twenty imputed data sets were generated using Proc MI and the estimates from the models were pooled using Proc MIANALYZE.

SUPPLEMENTARY MATERIAL

Supplementary figure. Flowchart of the study

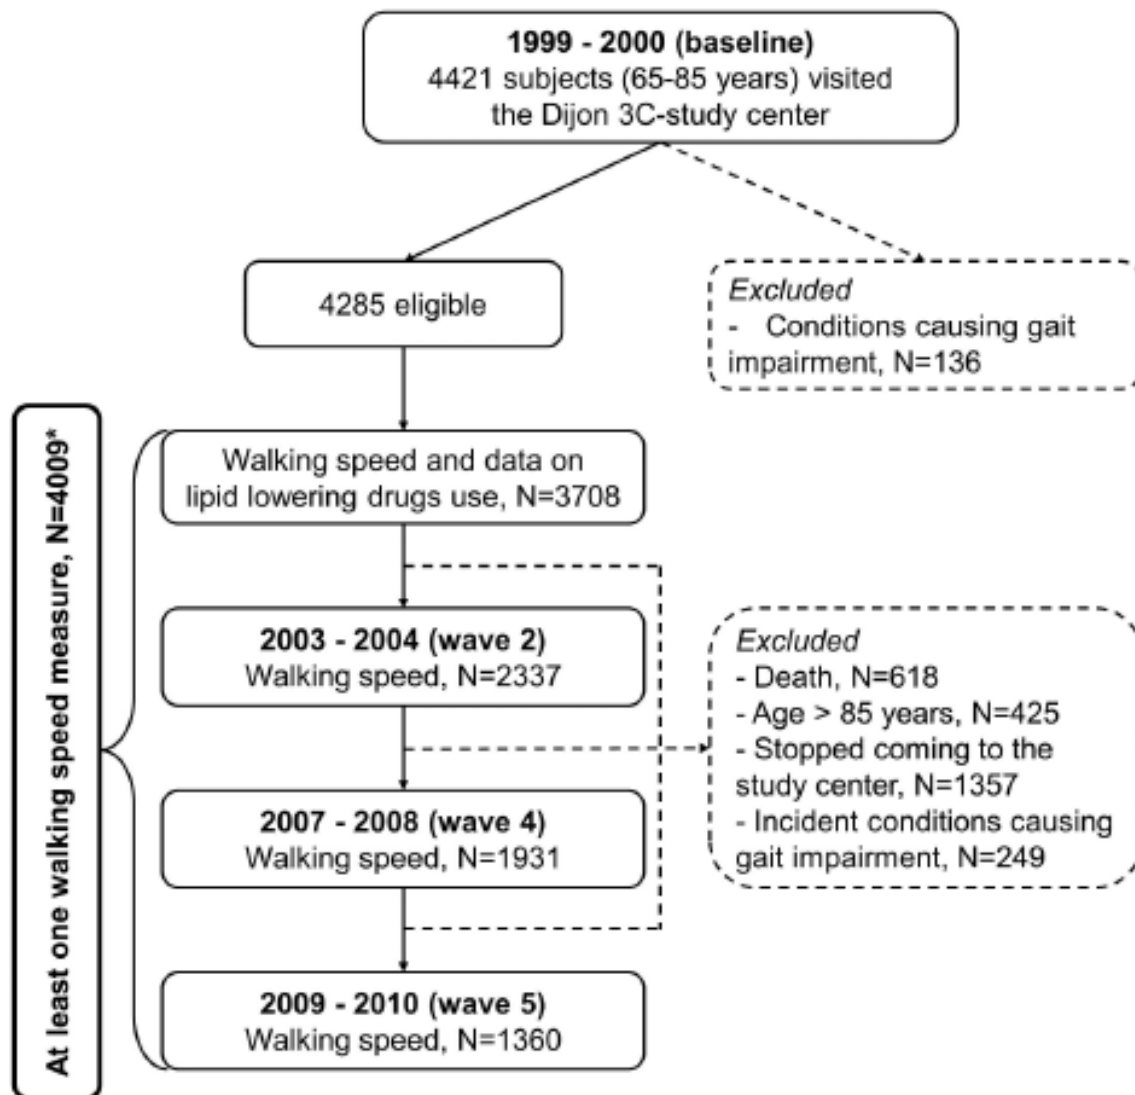

\*301 subjects had at least one measure of walking during follow-up but not at baseline.

SUPPLEMENTARY MATERIAL

Supplementary table 1. Association between use of LLDs at baseline (statins or fibrates) and change in fast walking speed (in cm/s) over the follow-up

| Change in fast walking speed | Model 1                |         | Model 2                |         | Model 3                |         |
|------------------------------|------------------------|---------|------------------------|---------|------------------------|---------|
|                              | Estimate (95% CI)      | P Value | Estimate (95% CI)      | P Value | Estimate (95% CI)      | P Value |
| Time (y)                     | -2.18 (-2.37 to -2.00) | <0.001  | -2.45 (-2.83 to -2.07) | <0.001  | -2.60 (-3.08 to -2.13) | <0.001  |
| Age at baseline x Time       | -0.06 (-0.09 to -0.02) | <0.001  | -0.07 (-0.10 to -0.03) | <0.001  | -0.07 (-0.10 to 0.04)  | <0.001  |
| Sex (men vs women) x Time    | -0.27 (-0.54 to 0.00)  | 0.050   | 0.25 (-0.12 to 0.63)   | 0.17    | 0.17 (-0.22 to 0.56)   | 0.38    |
| LLDs use at baseline x Time  |                        |         |                        |         |                        |         |
| No x Time                    | Reference              | —       | Reference              | —       | Reference              | —       |
| Statins x Time               | 0.59 (0.25 to 0.94)    | <0.001  | 0.62 (0.28 to 0.97)    | <0.001  | 0.67 (0.31 to 1.02)    | <0.001  |
| Fibrates x Time              | 0.48 (0.13 to 0.82)    | 0.007   | 0.44 (0.07 to 0.81)    | 0.021   | 0.48 (0.10 to 0.86)    | 0.009   |
| LDL-cholesterol x Time       | 0.12 (-0.04 to 0.27)   | 0.13    | 0.07 (-0.08 to 0.22)   | 0.38    | 0.04 (-0.12 to 0.20)   | 0.61    |
| HDL-cholesterol x Time       | 0.25 (-0.13 to 0.62)   | 0.19    | 0.08 (-0.30 to 0.46)   | 0.68    | 0.12 (-0.27 to 0.51)   | 0.55    |
| Triglycerides (log) x Time   | -0.21 (-0.57 to 0.16)  | 0.27    | -0.14 (-0.52 to 0.23)  | 0.44    | -0.16 (-0.55 to 0.22)  | 0.41    |

Continuous variables (age, LDL- and HDL-cholesterol, height, BMI, homocysteine, MMSE) were centered at their population mean; the reference groups for categorical variables were: baccalaureate degree; physically active; less than 20 pack-years of smoking; no alcohol consumption; no history of hypertension, diabetes mellitus, depression, coronary disease or peripheral artery disease; no use of NSAIDs, aspirin or psychotropic drugs.

Model 1: Mixed model adjusted for age, sex, LLDs use, baseline levels of cholesterol and triglycerides, and their interactions with time.

Model 2: Model 1 + baseline height, BMI, education level, hypertension, diabetes mellitus, coronary disease, use of psychotropic drugs or aspirin, level of homocysteine, and their interactions with time.

Model 3: Model 2 + baseline depressive symptoms, MMSE, physical activity, alcohol, smoking, peripheral artery disease, use of NSAIDs, and their interactions with time.

SUPPLEMENTARY MATERIAL

Supplementary table 2. Association between use of LLDs use over the follow-up (modelled at time-dependent variabls) and change in fast walking speed (in cm/s) over the follow-up

| Change in fast walking speed   | Model 1                |         | Model 2                |         | Model 3                |         |
|--------------------------------|------------------------|---------|------------------------|---------|------------------------|---------|
|                                | Estimate (95% CI)      | P Value | Estimate (95% CI)      | P Value | Estimate (95% CI)      | P Value |
| Time (y)                       | -2.10 (-2.29 to -1.92) | <0.001  | -2.22 (-3.21 to -1.23) | <0.001  | -2.27 (-3.71 to -0.83) | 0.002   |
| Age at baseline x Time         | -0.06 (-0.09 to -0.02) | <0.001  | -0.07 (-0.14 to -0.01) | 0.03    | -0.04 (-0.11 to 0.03)  | 0.28    |
| Sex (men vs women) x Time      | -0.28 (-0.54 to -0.01) | 0.04    | 0.12 (-0.71 to 0.95)   | 0.78    | 0.31 (-0.58 to 1.20)   | 0.50    |
| Time-dependant LLDs use x Time | 0.30 (0.04 to 0.56)    | 0.02    | 0.90 (0.28 to 1.51)    | 0.004   | 0.88 (0.26 to 1.51)    | 0.006   |
| LDL-cholesterol x Time         | 0.07 (-0.08 to 0.23)   | 0.34    | 0.07 (-0.27 to 0.42)   | 0.68    | 0.12 (-0.24 to 0.47)   | 0.52    |
| HDL-cholesterol x Time         | 0.24 (-0.13 to 0.61)   | 0.20    | 0.34 (-0.50 to 1.17)   | 0.43    | 0.41 (-0.44 to 1.26)   | 0.34    |
| Triglycerides (log) x Time     | -0.19 (-0.55 to 0.17)  | 0.30    | 0.38 (-0.40 to 1.16)   | 0.34    | 0.54 (-0.27 to 1.34)   | 0.19    |

Continuous variables (age, LDL- and HDL-cholesterol, height, BMI, homocysteine, MMSE) were centered at their population mean; the reference groups for categorical variables were: baccalaureate degree; physically active; less than 20 pack-years of smoking; no alcohol consumption; no history of hypertension, diabetes mellitus, depression, coronary disease or peripheral artery disease; no use of NSAIDs, aspirin or psychotropic drugs.

Model 1: Mixed model adjusted for baseline covariates (age, sex, levels of cholesterol and triglycerides) and time-dependent LLDs use, and their interactions with time.

Model 2: Model 1 + baseline (height, education level, homocysteine level) and time-dependent (LLDs use, BMI, hypertension, diabetes mellitus, coronary artery disease, use of psychotropic drugs and aspirin) covariates, and their interactions with time.

Model 3: Model 2 and time-dependent (depressive symptoms, MMSE, physical activity, alcohol, smoking, peripheral artery disease, use of NSAIDs), and their interactions with time.

SUPPLEMENTARY MATERIAL

Supplementary table 3. Baseline characteristics of participants included in the analysis based on propensity scores

| Baseline characteristics               | Use of LLDs at baseline |              |          |
|----------------------------------------|-------------------------|--------------|----------|
|                                        | No (N=1116)             | Yes (N=1116) | P Value* |
| Age, years, mean (SD)                  | 73.3 (4.7)              | 73.2 (4.4)   | 0.52     |
| Women, n (%)                           | 690 (61.8)              | 714 (63.9)   | 0.29     |
| BMI, kg/m <sup>2</sup> , mean (SD)     | 25.9 (4.2)              | 25.9 (3.9)   | 0.94     |
| Height, cm, mean (SD)                  | 161.7 (8.8)             | 161.1 (8.3)  | 0.10     |
| Primary school or less, n (%)          | 729 (65.3)              | 736 (65.9)   | 0.82     |
| Depressive symptoms, n (%)             | 144 (12.9)              | 134 (12.0)   | 0.52     |
| MMSE, mean (SD)                        | 27.4 (1.9)              | 27.4 (1.9)   | 0.98     |
| Low physical activity, n (%)           | 248 (22.2)              | 243 (21.8)   | 0.80     |
| Current drinker, n (%)                 | 883 (79.1)              | 886 (79.4)   | 0.98     |
| Hypertension, n (%)                    | 916 (82.2)              | 915 (82.0)   | 0.96     |
| Diabetes mellitus, n (%)               | 114 (10.2)              | 119 (10.7)   | 0.73     |
| LDL-cholesterol, mmol/L, mean (SD)     | 3.45 (0.82)             | 3.40 (0.79)  | 0.16     |
| HDL-cholesterol, mmol/L, mean (SD)     | 1.64 (0.41)             | 1.64 (0.40)  | 0.94     |
| Triglycerides (log), mmol/L, mean (SD) | 0.10 (0.40)             | 0.08 (0.42)  | 0.18     |

\* Chi-square test or Student's test.

SUPPLEMENTARY MATERIAL

Supplementary table 4. Association between use of LLDs at baseline and change in fast walking speed over the follow-up: analysis based on propensity scores

| <b>Change in fast walking speed</b> | <b>Model 1</b>           |                | <b>Model 2</b>           |                | <b>Model 3</b>           |                |
|-------------------------------------|--------------------------|----------------|--------------------------|----------------|--------------------------|----------------|
|                                     | <b>Estimate (95% CI)</b> | <b>P Value</b> | <b>Estimate (95% CI)</b> | <b>P Value</b> | <b>Estimate (95% CI)</b> | <b>P Value</b> |
| Time (y)                            | -1.88 (-2.29 to -1.48)   | <0.001         | -2.02 (-2.83 to -1.21)   | <0.001         | -2.14 (-3.10 to -1.19)   | <0.001         |
| Age x Time                          | -0.03 (-0.09 to 0.03)    | 0.32           | -0.04 (-0.10 to 0.02)    | 0.20           | -0.06 (-0.12 to 0.01)    | 0.07           |
| Sex (men vs women) x Time           | -0.64 (-1.18 to -0.10)   | 0.02           | -0.28 (-1.01 to 0.42)    | 0.45           | -0.40 (-1.15 to 0.35)    | 0.30           |
| Baseline LLDs use x Time            | 0.52 (0.03 to 1.01)      | 0.03           | 0.53 (0.04 to 1.02)      | 0.03           | 0.57 (0.08 to 1.06)      | 0.02           |
| LDL-cholesterol x Time              | 0.12 (-0.19 to 0.43)     | 0.45           | 0.07 (-0.24 to 0.38)     | 0.65           | 0.08 (-0.23 to 0.39)     | 0.61           |
| HDL-cholesterol x Time              | -0.16 (-0.91 to 0.60)    | 0.68           | -0.23 (-0.98 to 0.52)    | 0.54           | -0.30 (-1.06 to 0.46)    | 0.44           |
| Triglycerides x Time                | -0.48 (-1.20 to 0.23)    | 0.19           | -0.49 (-1.21 to 0.23)    | 0.18           | -0.51 (-1.23 to 0.21)    | 0.17           |

Continuous variables (age, LDL- and HDL-cholesterol, height, BMI, homocysteine, MMSE) were centered at their population mean; the reference groups for categorical variables were: baccalaureate degree; physically active; less than 20 pack-years of smoking; no alcohol consumption; no history of hypertension, diabetes mellitus, depression, coronary disease or peripheral artery disease; no use of NSAIDs, aspirin or psychotropic drugs.

Model 1: Mixed model adjusted for age, sex, LLDs use, baseline levels of cholesterol and triglycerides, and their interactions with time.

Model 2: Model 1 + baseline height, BMI, education level, hypertension, diabetes mellitus, coronary disease, use of psychotropic drugs or aspirin, level of homocysteine, and their interactions with time.

Model 3: Model 2 + baseline depressive symptoms, MMSE, physical activity, alcohol, smoking, peripheral artery disease, use of NSAIDs, and their interactions with time.

SUPPLEMENTARY MATERIAL

Supplementary table 5. Association between baseline use of LLDs use and change in fast walking speed (in cm/s) over the follow-up: analyses based on multiple imputation of missing values

| <b>Change in fast walking speed</b> | <b>Model 1</b>         |                | <b>Model 2</b>         |                | <b>Model 3</b>         |                |
|-------------------------------------|------------------------|----------------|------------------------|----------------|------------------------|----------------|
|                                     | <b>Estimate (SE)</b>   | <b>P Value</b> | <b>Estimate (SE)</b>   | <b>P Value</b> | <b>Estimate (SE)</b>   | <b>P Value</b> |
| Time (y)                            | -2.29 (-2.47 to -2.10) | <0.001         | -2.51 (-2.85 to -2.17) | <0.001         | -2.58 (-3.00 to -2.13) | <0.001         |
| Age x Time                          | -0.08 (-0.12 to -0.04) | <0.001         | -0.09 (-0.13 to -0.05) | <0.001         | -0.08 (-0.12 to -0.04) | <0.001         |
| Sex (men vs women) x Time           | -0.31 (-0.58 to -0.04) | 0.03           | 0.15 (-0.22 to 0.52)   | 0.44           | 0.12 (-0.25 to 0.49)   | 0.52           |
| Baseline LLD use x Time             | 0.31 (0.06 to 0.56)    | 0.01           | 0.31 (0.06 to 0.56)    | 0.02           | 0.32 (0.07 to 0.57)    | 0.01           |
| LDL-cholesterol x Time              | 0.08 (-0.06 to 0.22)   | 0.26           | 0.05 (-0.09 to 0.19)   | 0.53           | 0.02 (-0.12 to 0.16)   | 0.75           |
| HDL-cholesterol x Time              | 0.28 (-0.09 to 0.65)   | 0.16           | 0.06 (-0.31 to 0.43)   | 0.74           | 0.10 (-0.29 to 0.49)   | 0.62           |
| Triglycerides (log) x Time          | -0.14 (-0.49 to 0.21)  | 0.45           | -0.05 (-0.40 to 0.30)  | 0.80           | -0.06 (-0.43 to 0.31)  | 0.75           |

Continuous variables (age, LDL- and HDL-cholesterol, height, BMI, homocysteine, MMSE) were centered at their population mean; the reference groups for categorical variables were: baccalaureate degree; physically active; less than 20 pack-years of smoking; no alcohol consumption; no history of hypertension, diabetes mellitus, depression, coronary disease or peripheral artery disease; no use of NSAIDs, aspirin or psychotropic drugs.

Model 1: Mixed model adjusted for baseline covariates (age, sex, levels of cholesterol and triglycerides), and their interactions with time.

Model 2: Model 1 + baseline (height, education level, homocysteine level) and time-dependent (hypertension, diabetes mellitus, coronary artery disease, use of psychotropic drugs and aspirin) covariates, and their interactions with time.

Model 3: Model 2 + baseline (physical activity, depressive symptoms) and time-dependent (MMSE score, alcohol, smoking, use of NSAIDs) covariates, and their interactions with time.



## SUPPLEMENTARY MATERIAL

### Supplementary References

1. Lenoir H, Dufouil C, Auriacombe S, et al. Depression History, Depressive Symptoms, and Incident Dementia: The 3C Study. *J Alzheimers Dis.* 2011;26:27-38.
2. Radloff L. The CES-D scale: A self report depression scale for research in the general population. *Applied Psychological Measurement.* 1977;1:385-401.
3. Lawton MP, Brody EM. Assessment of older people: self-maintaining and instrumental activities of daily living. *Gerontologist.* 1969;9:179-186.
4. Rosow I, Breslau N. A Guttman health scale for the aged. *J Gerontol.* 1966;21:556-559.
5. Katz S, Downs TD, Cash HR, Grotz RC. Progress in development of the index of ADL. *Gerontologist.* 1970;10:20-30.
6. D'Agostino RB, Jr. Propensity score methods for bias reduction in the comparison of a treatment to a non-randomized control group. *Statistics in medicine.* 1998;17:2265-2281.
7. Kurth T, Walker AM, Glynn RJ, et al. Results of multivariable logistic regression, propensity matching, propensity adjustment, and propensity-based weighting under conditions of nonuniform effect. *Am J Epidemiol.* 2006;163:262-270.
